# Supplementary material for: Aerodigestive sampling reveals altered microbial exchange between lung, oropharyngeal, and gastric microbiomes in children with impaired swallow function
Source: PLOS journal article supplement (doi:10.1371/journal.pone.0216453), 2019-05-20
Supplement: S10 (10.1371/journal.pone.0216453.s010) [file journal.pone.0216453.s010]

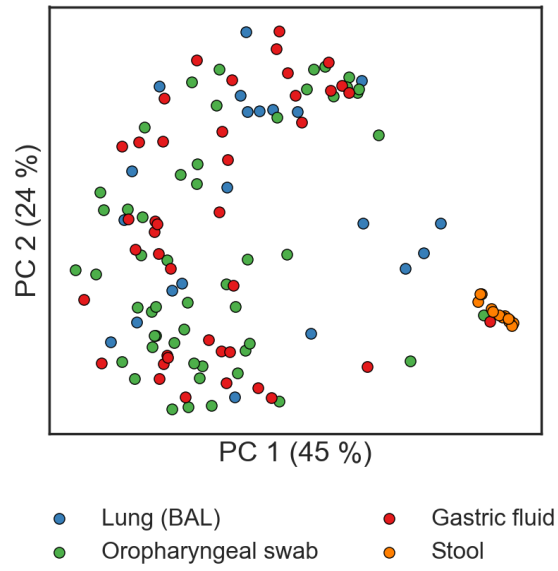

Supplementary Figure 4: PCoA plots of aerodigestive and stool microbial communities for all patients in the sequencing batch shown in Figure 2A, based on the Bray-Curtis distance.
